# Supplementary material
Source: PubMed Central journal article supplement (PMC1131933)
Supplement: nar_33_9_2838__1.pdf [file nar_33_9_2838__1.pdf]

**Table S1 Primers used in primer extension**

| Gene         | ORF              | Sequence(5' →3')            | 5' Start position (related to <u>ATG</u> ) |
|--------------|------------------|-----------------------------|--------------------------------------------|
| <i>BGL2</i>  | <i>YGR282C</i>   | AGTAGCTGCAGTAGCGAGTGTAG     | +36                                        |
| <i>EGD2</i>  | <i>YHR193C</i>   | TGGCGTTTTCTGGGATAGCAGAC     | +25                                        |
| <i>ERG20</i> | <i>YJL167W</i>   | CTTTTTCTGAAGCCATTTCTACG     | +16                                        |
| <i>COF1</i>  | <i>YLL050C</i>   | GTCATTGAAAGCGGTAAGGGATTC    | +54                                        |
| <i>YPT7</i>  | <i>YML001W</i>   | GAAGGGGTTTCTATATGGATAAG     | -21                                        |
| <i>HOR7</i>  | <i>YMR251W-A</i> | GGAAACAACAACCTTGAGATAACTTC  | +27                                        |
| <i>TPI1</i>  | <i>YDR050C</i>   | CCACCGACAAAGAAAGTTCTAGCCAT  | +26                                        |
| <i>EGD1</i>  | <i>YPL037C</i>   | GCAGACAACCTTTGTAGCTTAGC     | +47                                        |
| <i>TEF2</i>  | <i>YBR118W</i>   | GACTTCTCTTTACCCATGTTTAGTTA  | +17                                        |
| <i>TDH3</i>  | <i>YGR192C</i>   | CTCTAACCATTTTGTGGTTTATGTGTG | +10                                        |
| <i>GCN4</i>  | <i>YEL009C</i>   | TTCGCTAGTGAAACTGATGGGC      | -485                                       |
| <i>SBA1</i>  | <i>YKL117W</i>   | CCTTTGAGCCCATGCAACTTGAGG    | +45                                        |

**Table S2 Non-coding RNA gene verification**

| <b>RNA</b>   | <b>Tag Sequence</b> | <b>Tag Occurrence</b> | <b>Anotated TSS</b> | <b>TSS in this study</b> |
|--------------|---------------------|-----------------------|---------------------|--------------------------|
| <i>RUF3</i>  | ACCCAAAAACATCAAGA   | 1                     | 0                   | 0                        |
| <i>snR31</i> | AAGCAAAATTACACC     | 1                     | 0                   | 1                        |
| <i>snR33</i> | AATGCCCTCTTTGTAC    | 1                     | 0                   | 6                        |
| <i>snR37</i> | AACATCAGTAGTGGTT    | 1                     | 0                   | 0                        |
| <i>snR4</i>  | ATCAACTATTACAGTC    | 1                     | 0                   | -3                       |
| <i>snR43</i> | CACTCCTGTTTCTGCCT   | 2                     | 0                   | 0                        |
| <i>snR51</i> | TTATTATGATGATTTTT   | 1                     | 0                   | -1                       |
| <i>snR61</i> | CTACAATGATGATAAAA   | 1                     | 0                   | 0                        |
| <i>SRG1</i>  | AATGCCTTTGTTTGGC    | 6                     | 0                   | 1                        |

The 5' SAGE tags were mapped to 9 non-coding RNA genes by comparing the tag 5' position to the annotated start position, which is denoted as 0, of the corresponding RNA gene. Most TSS are very close to the annotated RNA 5' end.

**Table S3 uORF-containing *S. cerevisiae* genes.**

| ORF       | Gene              | TSS <sup>a</sup> | uORF# | uORF sequences                                                                                                                                                                          |
|-----------|-------------------|------------------|-------|-----------------------------------------------------------------------------------------------------------------------------------------------------------------------------------------|
| YAR073W   | IMD1              | -106             | 1     | MCN <sup>b</sup>                                                                                                                                                                        |
| YBR073W   | RDH54             | -399             | 5     | MDVA* MDVLPSTSTSGKGIFTRSR* MHQENKK* MTVIFD*<br>MWLEIWMSCLLLLLKGAFLLDRVNICIKKIKNKTRRAKKKKENLL*                                                                                           |
| YBR158W   | AMN1              | -263             | 1     | MC*                                                                                                                                                                                     |
| YCL007C   |                   | -346             | 4     | MSFKTLPRDMGSNYGEDQALKWPVYTF* MPLYFYSYLFLCILILLIFLILRKRHLA* MEKIKL*<br>MARLHILIQP*                                                                                                       |
| YDL125C   | HNT1              | -174             | 4     | MCVRLESGEHYEVKQGSARLPDF* M* MK* MAGPFSSEEVTALLKHCCTIV*                                                                                                                                  |
| YDR005C   | MAF1              | -122             | 1     | MRKI*                                                                                                                                                                                   |
| YDR524C   | AGE1              | -403             | 6     | MEY* MSF* M* MFIFFFVVSAN* MLVFFPIAVVIIVLDEERRKVKI* MFHQ*                                                                                                                                |
| YER053C   | PIC2              | -98              | 1     | MTHC*                                                                                                                                                                                   |
| YER130C   |                   | -95              | 1     | MIFCFEFVQ*                                                                                                                                                                              |
| YER159C   | BUR6              | -192             | 2     | MH* MNLRRKKGQCTEK*                                                                                                                                                                      |
| YGL059W   |                   | -23              | 1     | MDK*                                                                                                                                                                                    |
| YHR071W   | PCL5              | -362             | 2     | MHSSVF* MRAIEDTGNNRIY*                                                                                                                                                                  |
| YIL094C   | LYS12             | -65              | 1     | MRLLY*                                                                                                                                                                                  |
| YKL186C   | MTR2              | -258             | 5     | MLL* MIDHDSLYVLQRLPLLTKKS* MTPCMYCRDCHY* MLRLY* MRKRIEQVTNLFL*                                                                                                                          |
| YKL194C   | MST1              | -49              | 1     | MQ*                                                                                                                                                                                     |
| YML106W   | URA5              | -308             | 1     | MKDTQKN*                                                                                                                                                                                |
| YMR009W   |                   | -447             | 4     | MIHMCASRIVCLDSEMPK* MHIEKHQSIEQRGWHLQIKNNNHQTRH* MQK* MKVISASFLCIDD*                                                                                                                    |
| YMR040W   |                   | -157             | 3     | M* MYSWPSLRKASRLEVNKYAECSELELCE* MNYVNRKILSKISKSS*                                                                                                                                      |
| YNL182C   | IPI3              | -60              | 1     | MR*                                                                                                                                                                                     |
| YNR034W-A |                   | -199             | 1     | M*                                                                                                                                                                                      |
| YOR031W   | CRS5              | -24              | 1     | MSNSTQ*                                                                                                                                                                                 |
| YOR051C   |                   | -459             | 3     | MRL* MFTIHF*<br>MKAGVTSPFLFPFHEVVAEKQFSAYIVLRPKEVKKKVREKELFFSSFEMLHILKNFNIN*                                                                                                            |
| YOR222W   | ODC2 <sup>c</sup> | -459             | 8     | MRHG* MLLFYARQIPELFFFQFFRGELFLPVYLERSCC* M* MVDQLVLLR* MK*<br>MPGKFLWNFFFFSFFVVSFFCLSISKDLVVDDSVQSRSLSTRHAFASNSVIKRSRLRFFSLKLFCTLLG*<br>MLTCVYCFRRSAFIKCKDNETWLTN* MTQCSRDFRLDMHLQVILL* |
| YPR165W   | RHO1              | -289             | 1     | MF*                                                                                                                                                                                     |

**a**, The TSS site was determined by most 5' multiple occurrence unitag of corresponding gene.

**b**, uORFs are translated in 3 forward frames. "\*" indicates translational stop codon.

**c**, *ODC2* was predicted as containing separate RNA coding transcripts in its 5' UTR (see Results section)

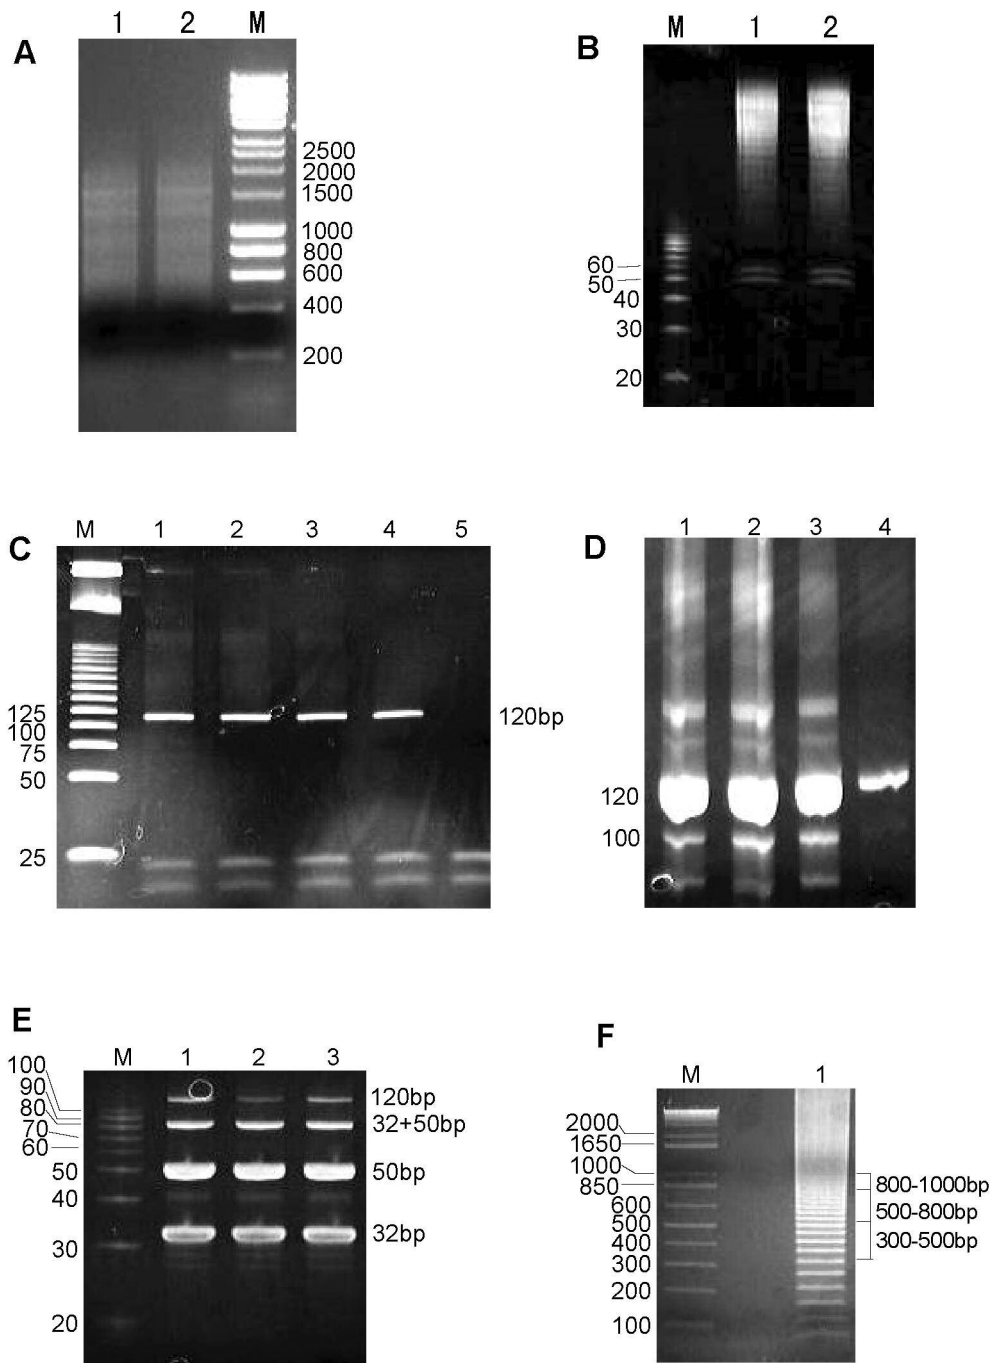

Figure S1

| Chr | Genes | Length(bp) | Unitags |
|-----|-------|------------|---------|
| 1   | 121   | 230210     | 150     |
| 2   | 460   | 813141     | 717     |
| 3   | 185   | 316616     | 265     |
| 4   | 850   | 1531914    | 1381    |
| 5   | 328   | 576869     | 552     |
| 6   | 143   | 270148     | 190     |
| 7   | 593   | 1090945    | 880     |
| 8   | 325   | 562641     | 429     |
| 9   | 250   | 439885     | 280     |
| 10  | 404   | 745666     | 531     |
| 11  | 346   | 666452     | 614     |
| 12  | 588   | 1078174    | 814     |
| 13  | 513   | 924429     | 753     |
| 14  | 439   | 784330     | 594     |
| 15  | 607   | 1091287    | 856     |
| 16  | 520   | 948060     | 732     |

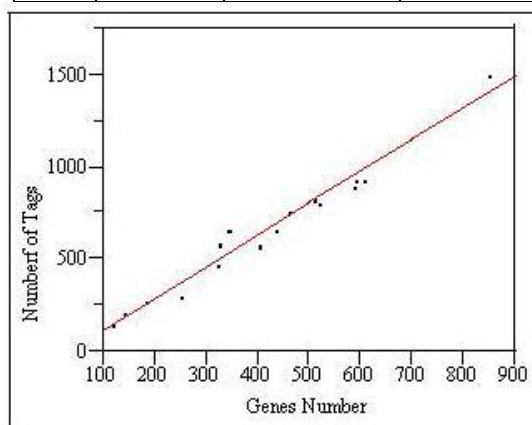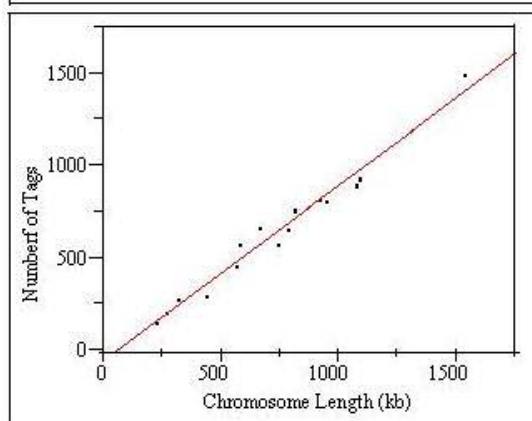

Figure S2

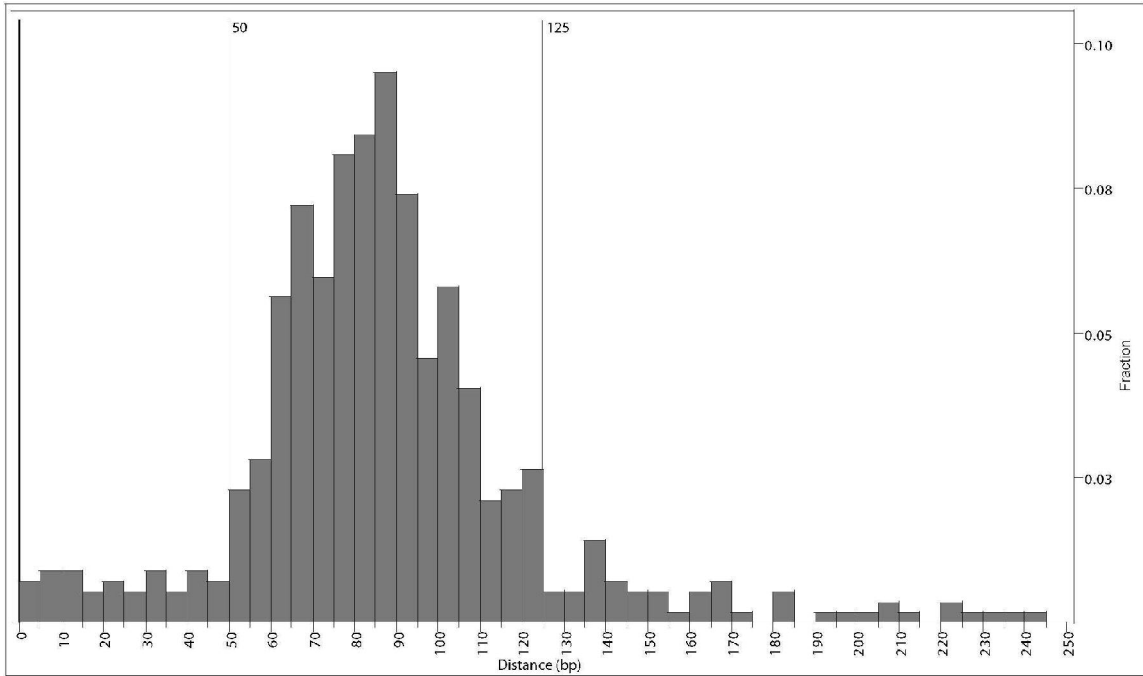

Figure S3

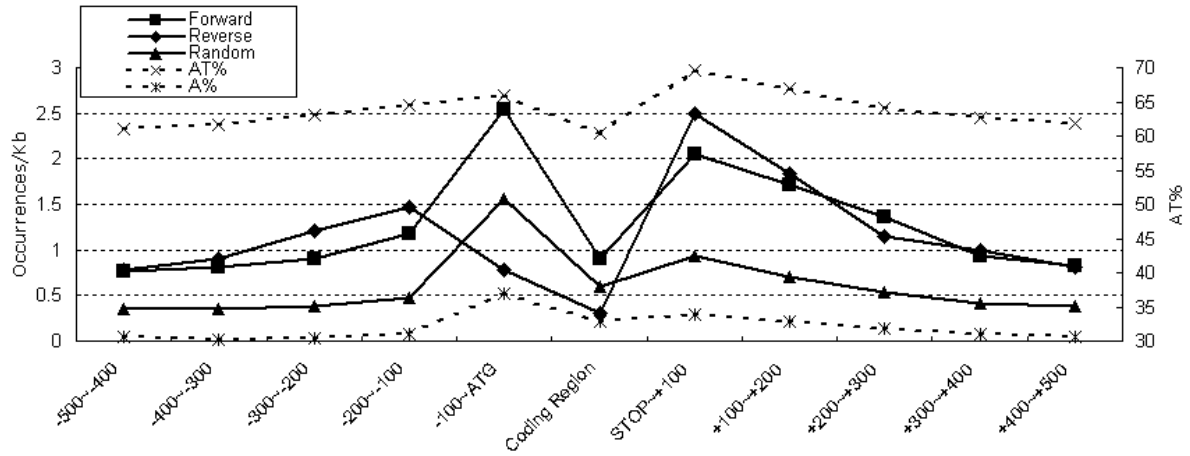

Figure S4

**Figure S1. Gel pictures of 5' SAGE library construction.** (A) Double strand cDNA after primer extension on 2% Agarose-EtBr gel. Lane 1: Anchoring primer A + CDS primers; Lane 2: Anchoring primer B + CDS primers. (B) *MmeI* digestion product on 15% TBE polyacrylamide gel. Lane 1: Anchoring primer A + CDS primers; Lane 2: Anchoring primer B + CDS primers. (C) Ditag amplifying optimization on 15% TBE polyacrylamide gel. Lane 1, template 1/10 dilution; Lane 2, 1/20; Lane 3, 1/40; Lane 4, 1/80; Lane 5, no ligation control (D) Ditag scale up amplification on 12% TBE polyacrylamide gel, using 1/80 dilution template. Lane 1-3, 30x50 $\mu$ l reaction per lane; Lane 4: 50 $\mu$ l reaction. (E) 120-bp ditag BamHI digestion on 12% polyacrylamide gel. Lane 1-3: digestion product. (F) Concatenation product on 2% Agarose-EtBr gel. Lane 1: concatenated ditags after ligation. Three different size ranges of fragments were cloned recovered and cloned. M: DNA size markers.

**Figure S2. Correlation between gene number/chromosome length and number of tags.** The tags with single hit are evenly distributed throughout the whole *S. cerevisiae* genome. Each dot in the plot represents data from a single chromosome. The highly correlation value indicates the 5' SAGE library result is not biased.

**Figure S3. TATA-TSS distances.** Distribution of distances between TATA element and TSS were calculated from 224 gene reported having single TATA element (1) and having TSS start sites (this study). A total of 568 pairs of TATA-TSS were calculated. Among them, 449 (79%) pairs fall into the range 50 to 125bp, which is consistent with previously reported result (2).

**Figure S4. The frequency of consensus pattern around the *S. cerevisiae* genes.** The occurrences of the TSS consensus sequence 500bp upstream, coding region, and downstream of 5888 genes in *S. cerevisiae*, were calculated in a 100bp window except the coding region, which is calculated as a single unit (Forward). The occurrences on the minus strand (Reverse) strand and random shuffled sequences (Random) are shown. The A% and AT% of corresponding region is also shown. The pattern of consensus sequences is treated as  $A(A_{\text{rich}>=3})_5N(C/T)A(A/T)NN(A_{\text{rich}>=4})_6$  in program search.



## Supplemental References

1. Basehoar, A.D., Zanton, S.J. and Pugh, B.F. (2004) Identification and distinct regulation of yeast TATA box-containing genes. *Cell*, **116**, 699-709.
2. Hampsey, M. (1998) Molecular genetics of the RNA polymerase II general transcriptional machinery. *Microbiol Mol Biol Rev*, **62**, 465-503.
